# Supplementary figures and images for: Learning cortical representations through perturbed and adversarial dreaming
Source: eLife journal article supplement (doi:10.7554/elife.76384), 2022-03-07

**a**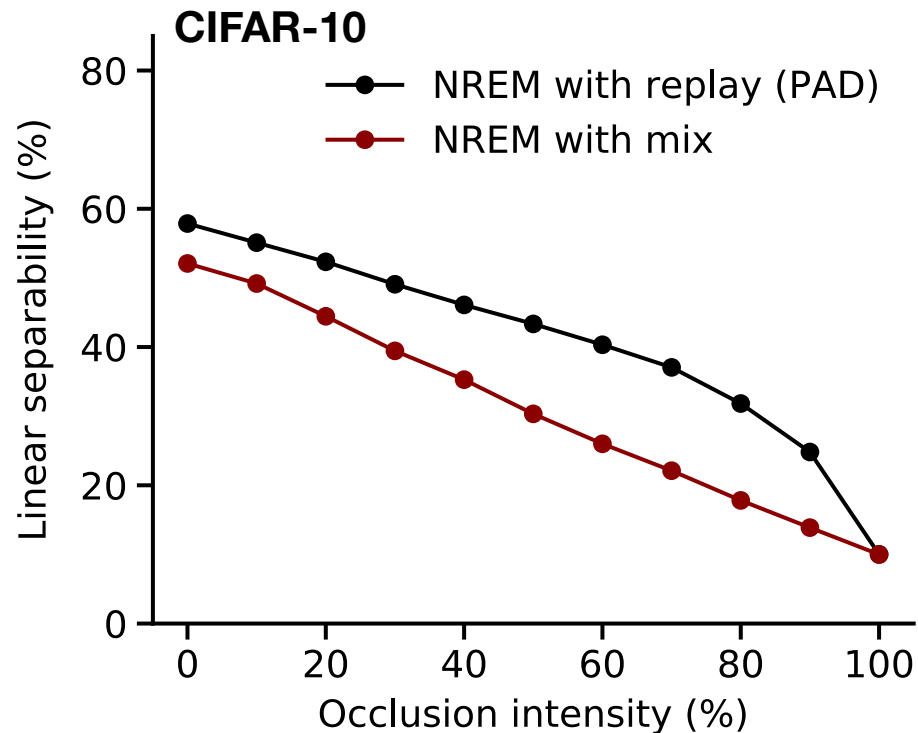**b**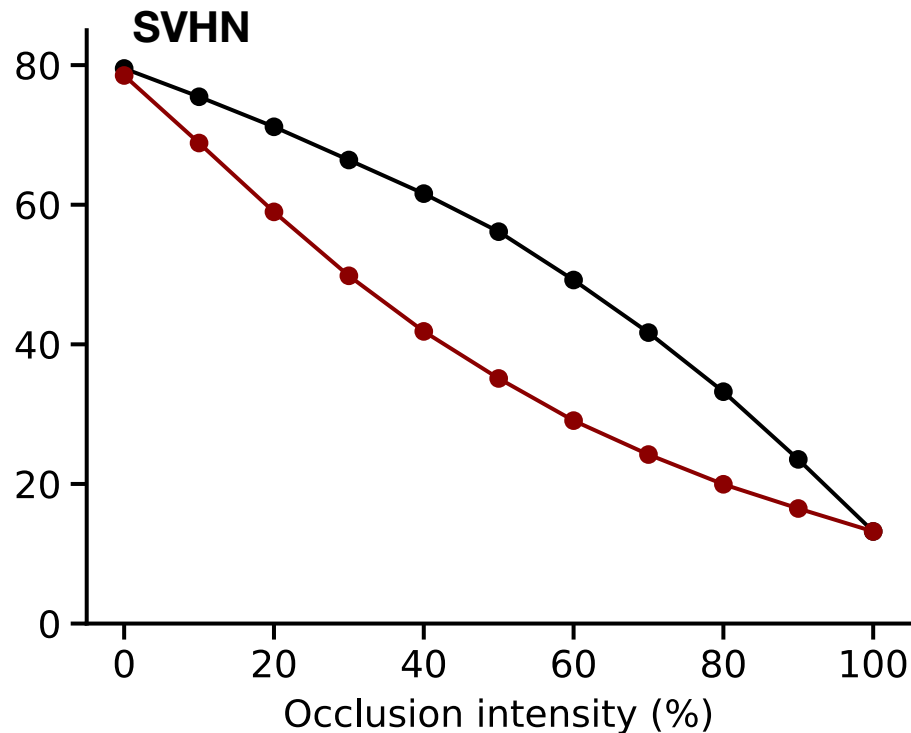

Supplement: supp [file elife-76384-supp-v1.zip]

**a****CIFAR-10**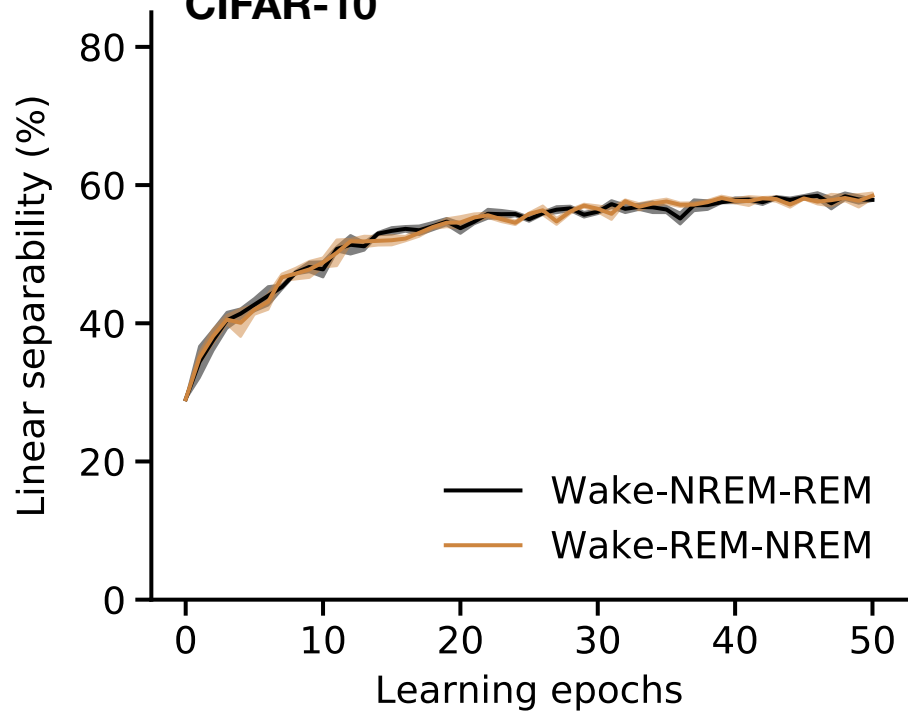**b****SVHN**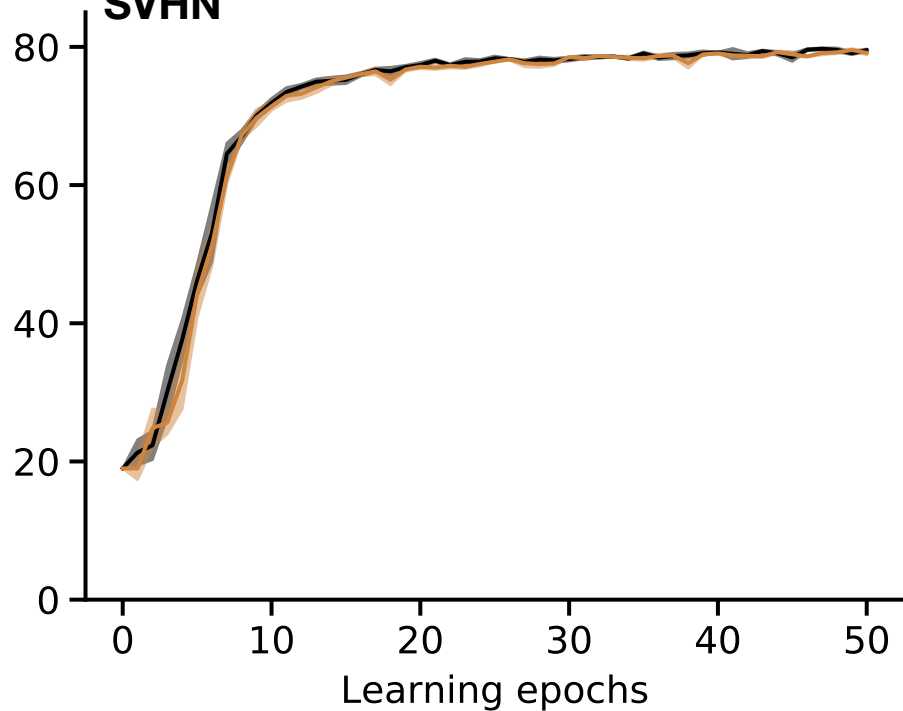

Supplement: supp [file elife-76384-supp-v1.zip]
